# Supplementary material for: The Top 100 Most Cited Articles Published in Dentistry: 2020 Update
Source: PubMed Central journal article supplement (PMC8003932; doi:10.3390/healthcare9030356), 2021-03-21
Supplement: healthcare-09-00356-s001.pdf [file healthcare-09-00356-s001.pdf]

**Table 1.** The list of the top 100 most-cited articles published in the dentistry.

| Sr No. | Article title                                                                                                                                                                                                              | Citation count (ES) | Citation count (GS) | Citation density | CCI 2020 |
|--------|----------------------------------------------------------------------------------------------------------------------------------------------------------------------------------------------------------------------------|---------------------|---------------------|------------------|----------|
| 1      | Silness J, Løe H. Periodontal disease in pregnancy II. Correlation between oral hygiene and periodontal condition. <i>Acta Odontol Scand.</i> 1964;22:121-135.                                                             | 4728                | 8281                | 84               | 269      |
| 2      | Løe H, Silness J. Periodontal disease in pregnancy I. Prevalence and severity. <i>Acta Odontol Scand.</i> 1963;21:533-551.                                                                                                 | 4062                | 7873                | 71               | 232      |
| 3      | Adell R, Lekholm U, Rockler B, Brånemark P-I. A 15-year study of osseointegrated implants in the treatment of the edentulous jaw. <i>Int J Oral Surg.</i> 1981;10:387-416.                                                 | 3392                | 6257                | 117              | 96       |
| 4      | Socransky S, Haffajee A, Cugini M, Smith C, Kent Jr R. Microbial complexes in subgingival plaque. <i>J Clin Periodontol.</i> 1998;25:134-144.                                                                              | 2633                | 4683                | 120              | 217      |
| 5      | Birkedal-Hansen H, Moore W, Bodden M, Windsor L, Birkedal-Hansen B, DeCarlo A, Engler J. Matrix metalloproteinases: a review. <i>Crit Rev Oral Biol Med.</i> 1993;4:197-250.                                               | 2529                | 3620                | 94               | 36       |
| 6      | Albrektsson T, Zarb G, Worthington P, Eriksson A. The long-term efficacy of currently used dental implants: a review and proposed criteria of success. <i>Int J Oral Maxillofac Implants.</i> 1986;1:11-25.                | 2417                | 5233                | 71               | 115      |
| 7      | Løe H. The gingival index, the plaque index and the retention index systems. <i>J Periodontol.</i> 1967;38:610-616.                                                                                                        | 2342                | 4136                | 44               | 168      |
| 8      | Løe H, Theilade E, Jensen SB. Experimental gingivitis in man. <i>J Periodontol.</i> 1965;36:177-187.                                                                                                                       | 1904                | 4376                | 35               | 80       |
| 9      | Marx RE, Carlson ER, Eichstaedt RM, Schimmele SR, Strauss JE, Georgeff KR. Platelet-rich plasma: growth factor enhancement for bone grafts. <i>Oral Surg Oral Med Oral Pathol Oral Radiol Endodontol.</i> 1998;85:638-646. | 1870                | 3663                | 85               | 111      |
| 10     | Guo Sa, DiPietro LA. Factors affecting wound healing. <i>J Dent Res.</i> 2010;89:219-229.                                                                                                                                  | 1859                | 3384                | 186              | 345      |
| 11     | Marx RE. Pamidronate (Aredia) and zoledronate (Zometa) induced avascular necrosis of the jaws: a growing epidemic. <i>J Oral Maxillofac Surg.</i> 2003;61:1115-1117.                                                       | 1852                | 3249                | 109              | 107      |
| 12     | Ainamo J, Bay I. Problems and proposals for recording gingivitis and plaque. <i>Int Dent J.</i> 1975;25:229.                                                                                                               | 1735                | 3066                | 38               | 160      |
| 13     | Warnakulasuriya S. Global epidemiology of oral and oropharyngeal cancer. <i>Oral Oncol.</i> 2009;45:309-316.                                                                                                               | 1700                | 2841                | 155              | 234      |
| 14     | Adell R, Eriksson B, Lekholm U, Brånemark P-I, Jemt T. A long-term follow-up study of osseointegrated implants in the treatment of totally edentulous jaws. <i>Int J Oral Maxillofac Implants.</i> 1990;5.                 | 1661                | 2982                | 55               | 28       |
| 15     | Buonocore MG. A simple method of increasing the adhesion of acrylic filling materials to enamel surfaces. <i>J Dent Res.</i> 1955;34:849-853.                                                                              | 1588                | 4476                | 24               | 45       |
| 16     | Le Guéhennec L, Soueidan A, Layrolle P, Amouriq Y. Surface treatments of titanium dental implants for rapid osseointegration. <i>Dent Mater.</i> 2007;23:844-854.                                                          | 1560                | 2426                | 120              | 148      |

|    |                                                                                                                                                                                                                                   |      |      |    |     |
|----|-----------------------------------------------------------------------------------------------------------------------------------------------------------------------------------------------------------------------------------|------|------|----|-----|
| 17 | Ruggiero SL, Mehrotra B, Rosenberg TJ, Engroff SL. Osteonecrosis of the jaws associated with the use of bisphosphonates: a review of 63 cases. <i>J Oral Maxillofac Surg.</i> 2004;62:527-534.                                    | 1509 | 2555 | 94 | 40  |
| 18 | Donath K, Breuner G. A method for the study of undecalcified bones and teeth with attached soft tissues: The Säge-Schliff (sawing and grinding) Technique. <i>J Oral Pathol Med.</i> 1982;11:318-326.                             | 1480 | 2040 | 39 | 44  |
| 19 | O'Leary TJ, Drake RB, Naylor JE. The plaque control record. <i>J Periodontol.</i> 1972;43:38-38.                                                                                                                                  | 1371 | 2431 | 29 | 150 |
| 20 | Slade GD, Spencer AJ. Development and evaluation of the oral health impact profile. <i>Commun Dent Health.</i> 1994;11:3.                                                                                                         | 1353 | 2620 | 52 | 127 |
| 21 | Gronthos S, Brahim J, Li W, Fisher L, Cherman N, Boyde A, DenBesten P, Robey PG, Shi S. Stem cell properties of human dental pulp stem cells. <i>J Dent Res.</i> 2002;81:531-535.                                                 | 1299 | 2305 | 72 | 90  |
| 22 | Van Meerbeek B, De Munck J, Yoshida Y, Inoue S, Vargas M, Vijay P, Van Landuyt K, Lambrechts P, Vanherle G. Adhesion to enamel and dentin: current status and future challenges. <i>Oper Dent.</i> 2003;28:215-35.                | 1294 | 2641 | 76 | 69  |
| 23 | Petersen PE. The World Oral Health Report 2003: continuous improvement of oral health in the 21st century—the approach of the WHO Global Oral Health Programme. <i>Commun Dent Oral Epidemiol.</i> 2003;31:3-24.                  | 1291 | 3873 | 76 | 126 |
| 24 | Moorrees CF, Fanning EA, Hunt Jr EE. Age variation of formation stages for ten permanent teeth. <i>J Dent Res.</i> 1963;42:1490-1502.                                                                                             | 1245 | 2404 | 22 | 66  |
| 25 | Marx RE. Platelet-rich plasma: evidence to support its use. <i>J Oral Maxillofac Surg.</i> 2004;62:489-496.                                                                                                                       | 1196 | 2374 | 75 | 89  |
| 26 | De Munck Jd, Van Landuyt K, Peumans M, Poitevin A, Lambrechts P, Braem M, Van Meerbeek B. A critical review of the durability of adhesion to tooth tissue: methods and results. <i>J Dent Res.</i> 2005;84:118-132.               | 1196 | 2409 | 82 | 73  |
| 27 | Branemark P-I. Osseointegration and its experimental background. <i>J Prosthet Dent.</i> 1983;50:399-410.                                                                                                                         | 1188 | 2737 | 32 | 65  |
| 28 | Marx RE, Sawatari Y, Fortin M, Broumand V. Bisphosphonate-induced exposed bone (osteonecrosis/osteopetrosis) of the jaws: risk factors, recognition, prevention, and treatment. <i>J Oral Maxillofac Surg.</i> 2005;63:1567-1575. | 1166 | 2039 | 78 | 46  |
| 29 | Slade GD. Derivation and validation of a short-form oral health impact profile. <i>Commun Dent Oral Epidemiol.</i> 1997;25:284-290.                                                                                               | 1165 | 2311 | 51 | 163 |
| 30 | Greene JG, Vermillion JR. The simplified oral hygiene index. <i>J Am Dent Assoc.</i> 1964;68:7-13.                                                                                                                                | 1162 | 2723 | 21 | 120 |
| 31 | Huang G-J, Gronthos S, Shi S. Mesenchymal stem cells derived from dental tissues vs. those from other sources: their biology and role in regenerative medicine. <i>J Dent Res.</i> 2009;88:792-806.                               | 1034 | 1721 | 94 | 98  |
| 32 | Haffajee AD. Microbial etiological agents of destructive periodontal diseases. <i>Periodontol 2000.</i> 1994;5:78-111.                                                                                                            | 1132 | 2307 | 44 | 31  |
| 33 | Denry I, Kelly JR. State of the art of zirconia for dental applications. <i>Dent Mater.</i> 2008;24:299-307.                                                                                                                      | 1132 | 2066 | 94 | 160 |

|    |                                                                                                                                                                                                                                                                                                                                                     |      |      |     |     |
|----|-----------------------------------------------------------------------------------------------------------------------------------------------------------------------------------------------------------------------------------------------------------------------------------------------------------------------------------------------------|------|------|-----|-----|
| 34 | Houston W. The analysis of errors in orthodontic measurements. <i>Am J Orthod.</i> 1983;83:382-390.                                                                                                                                                                                                                                                 | 1116 | 2055 | 30  | 49  |
| 35 | Schiffman E, Ohrbach R, Truelove E, Look J, Anderson G, Goulet J-P, List T, Svensson P. Diagnostic criteria for temporomandibular disorders (DC/TMD) for clinical and research applications: recommendations of the International RDC/TMD Consortium Network and Orofacial Pain Special Interest Group. <i>J Oral Fac Pain Headache.</i> 2014;28:6. | 1087 | 1772 | 181 | 299 |
| 36 | Schropp L, Wenzel A, Kostopoulos L, Karring T. Bone healing and soft tissue contour changes following single-tooth extraction: a clinical and radiographic 12-month prospective study. <i>Int J Periodont Restor Dent.</i> 2003;23.                                                                                                                 | 1019 | 2149 | 60  | 96  |
| 37 | Beck J, Garcia R, Heiss G, Vokonas PS, Offenbacher S. Periodontal disease and cardiovascular disease. <i>J Periodontol.</i> 1996;67:1123-1137.                                                                                                                                                                                                      | 1016 | 2008 | 42  | 37  |
| 38 | Ruggiero SL, Dodson TB, Fantasia J, Goodday R, Aghaloo T, Mehrotra B, O'Ryan F. American Association of Oral and Maxillofacial Surgeons position paper on medication-related osteonecrosis of the jaw— 2014 update. <i>J Oral Maxillofac Surg.</i> 2014;72:1938-1956.                                                                               | 1001 | 1509 | 167 | 244 |
| 39 | Turesky S, Gilmore ND, Glickman I. Reduced plaque formation by the chloromethyl analogue of vitamin C. <i>J Periodontol.</i> 1970;41:41-43.                                                                                                                                                                                                         | 997  | 1512 | 20  | 57  |
| 40 | Humphrey SP, Williamson RT. A review of saliva: normal composition, flow, and function. <i>J Prosthet Dent.</i> 2001;85:162-169.                                                                                                                                                                                                                    | 989  | 1897 | 52  | 149 |
| 41 | Araújo MG, Lindhe J. Dimensional ridge alterations following tooth extraction. An experimental study in the dog. <i>J Clin Periodontol.</i> 2005;32:212-218.                                                                                                                                                                                        | 980  | 2051 | 65  | 105 |
| 42 | Buser D, Mericske-stern R, Pierre Bernard JP, Behneke A, Behneke N, Hirt HP, Belser UC, Lang NP. Long-term evaluation of non-submerged ITI implants. Part 1: 8-year life table analysis of a prospective multi-center study with 2359 implants. <i>Clin Oral Implants Res.</i> 1997;8:161-172.                                                      | 952  | 1865 | 41  | 26  |
| 43 | Zehnder M. Root canal irrigants. <i>J Endod.</i> 2006;32:389-398.                                                                                                                                                                                                                                                                                   | 938  | 2101 | 67  | 114 |
| 44 | Socransky SS, Haffajee AD. Periodontal microbial ecology. <i>Periodontol 2000.</i> 2005;38:135-187.                                                                                                                                                                                                                                                 | 935  | 1822 | 62  | 79  |
| 45 | Feilzer A, De Gee A, Davidson C. Setting stress in composite resin in relation to configuration of the restoration. <i>J Dent Res.</i> 1987;66:1636-1639.                                                                                                                                                                                           | 931  | 1642 | 28  | 23  |
| 46 | Eke PI, Dye B, Wei L, Thornton-Evans G, Genco R. Prevalence of periodontitis in adults in the United States: 2009 and 2010. <i>J Dent Res.</i> 2012;91:914-920.                                                                                                                                                                                     | 930  | 1611 | 116 | 109 |
| 47 | Kornman KS, Crane A, Wang HY, Giovine FS, Newman MG, Pirk FW, Wilson Jr TG, Higginbottom FL, Duff GW. The interleukin-1 genotype as a severity factor in adult periodontal disease. <i>J Clin Periodontol.</i> 1997;24:72-77.                                                                                                                       | 896  | 1585 | 39  | 20  |
| 48 | Sjögren U, Hägglund B, Sundqvist G, Wing K. Factors affecting the long-term results of endodontic treatment. <i>J Endod.</i> 1990;16:498-504.                                                                                                                                                                                                       | 918  | 2191 | 31  | 63  |
| 49 | Ferracane JL. Resin composite—state of the art. <i>Dent Mater.</i> 2011;27:29-38.                                                                                                                                                                                                                                                                   | 918  | 1838 | 102 | 138 |

|    |                                                                                                                                                                                                                                                            |     |      |    |    |
|----|------------------------------------------------------------------------------------------------------------------------------------------------------------------------------------------------------------------------------------------------------------|-----|------|----|----|
| 50 | Cawood J, Howell R. A classification of the edentulous jaws. <i>Int J Oral Maxillofac Surg.</i> 1988;17:232-236.                                                                                                                                           | 898 | 1581 | 28 | 55 |
| 51 | Sundqvist G, Figdor D, Persson S, Sjögren U. Microbiologic analysis of teeth with failed endodontic treatment and the outcome of conservative re-treatment. <i>Oral Surgery, Oral Medicine, Oral Pathol Oral Radiol Endodontol.</i> 1998;85:86-93.         | 869 | 1971 | 40 | 36 |
| 52 | Eriksson A, Albrektsson T. Temperature threshold levels for heat-induced bone tissue injury: a vital-microscopic study in the rabbit. <i>J Prosthet Dent.</i> 1983;50:101-107.                                                                             | 864 | 1505 | 23 | 56 |
| 53 | Esposito M, Hirsch J-M, Lekholm U, Thomsen P. Biological factors contributing to failures of osseointegrated oral implants.(II). Etiopathogenesis. <i>Eur J Oral Sci.</i> 1998;106:721.                                                                    | 861 | 1617 | 39 | 33 |
| 54 | Buser D, Broggini N, Wieland M, Schenk R, Denzer A, Cochran D, Hoffmann B, Lussi A, Steinemann S. Enhanced bone apposition to a chemically modified SLA titanium surface. <i>J Dent Res.</i> 2004;83:529-533.                                              | 860 | 1326 | 54 | 60 |
| 55 | Jaffin RA, Berman CL. The excessive loss of Branemark fixtures in type IV bone: a 5-year analysis. <i>J Periodontol.</i> 1991;62:2-4.                                                                                                                      | 848 | 1585 | 29 | 22 |
| 56 | Offenbacher S, Katz V, Fertik G, Collins J, Boyd D, Maynor G, McKaig R, Beck J. Periodontal infection as a possible risk factor for preterm low birth weight. <i>J Periodontol.</i> 1996;67:1103-1113.                                                     | 846 | 2000 | 35 | 30 |
| 57 | Esposito M, Hirsch JM, Lekholm U, Thomsen P. Biological factors contributing to failures of osseointegrated oral implants.(I). Success criteria and epidemiology. <i>Eur J Oral Sci.</i> 1998;106:527-551.                                                 | 841 | 1591 | 38 | 35 |
| 58 | Page RC, Eke PI. Case definitions for use in population-based surveillance of periodontitis. <i>J Periodontol.</i> 2007;78:1387-1399.                                                                                                                      | 835 | 1301 | 64 | 94 |
| 59 | Sodek J, Ganss B, McKee M. Osteopontin. <i>Crit Rev Oral Biol Med.</i> 2000;11:279-303.                                                                                                                                                                    | 832 | 1262 | 42 | 35 |
| 60 | Wennerberg A, Albrektsson T. Effects of titanium surface topography on bone integration: a systematic review. <i>Clin Oral Implants Res.</i> 2009;20:172-184.                                                                                              | 831 | 1289 | 76 | 81 |
| 61 | Torabinejad M, Hong C, McDonald F, Ford TP. Physical and chemical properties of a new root-end filling material. <i>J Endod.</i> 1995;21:349-353.                                                                                                          | 829 | 2013 | 33 | 48 |
| 62 | Ainamo J. Development of the World Health Organization (WHO) community periodontal index of treatment needs (CPITN). <i>Int Dent J</i> 1982;32:281-291.                                                                                                    | 825 | 1694 | 22 | 38 |
| 63 | Ruggiero SL, Dodson TB, Assael LA, Landesberg R, Marx RE, Mehrotra B. American Association of Oral and Maxillofacial Surgeons position paper on bisphosphonate-related osteonecrosis of the jaws—2009 update. <i>J Oral Maxillofac Surg.</i> 2009;67:2-12. | 822 | 1206 | 75 | 42 |
| 64 | Marx RE. Platelet-rich plasma (PRP): what is PRP and what is not PRP? <i>Implant Dent.</i> 2001;10:225-228.                                                                                                                                                | 818 | 1780 | 43 | 71 |
| 65 | Lindhe J, Meyle J, Berglundh T, Claffey N, De Bruyn H, Heitz-Mayfield N, Karoussis I, Könönen E, Mombelli A, Renvert S, van Winkelhoff A, Winkel E, Zitzmann N. Peri-implant diseases: consensus                                                           | 812 | 1600 | 68 | 99 |

|    |                                                                                                                                                                                                                                                                           |     |      |    |     |
|----|---------------------------------------------------------------------------------------------------------------------------------------------------------------------------------------------------------------------------------------------------------------------------|-----|------|----|-----|
|    | report of the sixth European workshop on periodontology. <i>J Clin Periodontol.</i> 2008;35:282-285.                                                                                                                                                                      |     |      |    |     |
| 66 | Bollenl CM, Lambrechts P, Quirynen M. Comparison of surface roughness of oral hard materials to the threshold surface roughness for bacterial plaque retention: a review of the literature. <i>Dent Mater.</i> 1997;13:258-269.                                           | 811 | 1497 | 35 | 99  |
| 67 | Socransky SS, Haffajee AD. The bacterial etiology of destructive periodontal disease: current concepts. <i>J Periodontol.</i> 1992;63:322-331.                                                                                                                            | 806 | 1685 | 29 | 18  |
| 68 | Locker D. Measuring oral health: a conceptual framework. <i>Commun Dent Health.</i> 1988;5:3-18.                                                                                                                                                                          | 782 | 1595 | 24 | 71  |
| 69 | Grossi SG, Zambon JJ, Ho AW, Koch G, Dunford RG, Machtei EE, Norderyd OM, Genco RJ. Assessment of risk for periodontal disease. I. Risk indicators for attachment loss. <i>J Periodontol.</i> 1994;65:260-267.                                                            | 769 | 1572 | 30 | 20  |
| 70 | Manicone PF, Iommetti PR, Raffaelli L. An overview of zirconia ceramics: basic properties and clinical applications. <i>J Dent.</i> 2007;35:819-826.                                                                                                                      | 768 | 1447 | 59 | 80  |
| 71 | Scarfe WC, Farman AG, Sukovic P. Clinical applications of cone-beam computed tomography in dental practice. <i>J Can Dent Assoc.</i> 2006;72:75.                                                                                                                          | 761 | 1948 | 54 | 64  |
| 72 | Gold OG, Jordan H, Van Houte J. A selective medium for <i>Streptococcus mutans</i> . <i>Arch Oral Biol.</i> 1973;18:1357-1364.                                                                                                                                            | 759 | 1218 | 16 | 13  |
| 73 | Nyman S, Lindhe J, Karring T, Rylander H. New attachment following surgical treatment of human periodontal disease. <i>J clin periodontol.</i> 1982;9:290-296.                                                                                                            | 757 | 1662 | 20 | 16  |
| 74 | Marx RE. Osteoradionecrosis: a new concept of its pathophysiology. <i>J Oral Maxillofac Surg.</i> 1983;41:283-288.                                                                                                                                                        | 756 | 1251 | 20 | 54  |
| 75 | Warnakulasuriya S, Johnson NW, Van der Waal I. Nomenclature and classification of potentially malignant disorders of the oral mucosa. <i>J Oral Pathol Med.</i> 2007;36:575-580.                                                                                          | 754 | 1482 | 58 | 93  |
| 76 | Haraszthy V, Zambon J, Trevisan M, Zeid M, Genco R. Identification of periodontal pathogens in atheromatous plaques. <i>J Periodontol.</i> 2000;71:1554-1560.                                                                                                             | 752 | 1408 | 38 | 30  |
| 77 | Moore W, Moore LV. The bacteria of periodontal diseases. <i>Periodontol 2000.</i> 1994;5:66-77.                                                                                                                                                                           | 751 | 1405 | 29 | 28  |
| 78 | Corah NL. Development of a dental anxiety scale. <i>J Dent Res.</i> 1969;48:596-596.                                                                                                                                                                                      | 747 | 1626 | 15 | 26  |
| 79 | Dohan DM, Choukroun J, Diss A, Dohan SL, Dohan AJ, Mouhyi J, Gogly B. Platelet-rich fibrin (PRF): a second-generation platelet concentrate. Part I: technological concepts and evolution. <i>Oral Surg Oral Med Oral Pathol Oral Radiol Endodontol.</i> 2006;101:e37-e44. | 747 | 1605 | 53 | 119 |
| 80 | Breschi L, Mazzoni A, Ruggeri A, Cadenaro M, Di Lenarda R, Dorigo EDS. Dental adhesion review: aging and stability of the bonded interface. <i>Dent Mater.</i> 2008;24:90-101.                                                                                            | 746 | 1413 | 62 | 65  |
| 81 | Yoshida Y, Nagakane K, Fukuda R, Nakayama Y, Okazaki M, Shintani H, Inoue S, Tagawa Y, Suzuki K, De Munck J. Comparative study on adhesive performance of functional monomers. <i>J Dent Res.</i> 2004;83:454-458.                                                        | 745 | 1246 | 47 | 58  |

|    |                                                                                                                                                                                                                                                     |     |      |    |     |
|----|-----------------------------------------------------------------------------------------------------------------------------------------------------------------------------------------------------------------------------------------------------|-----|------|----|-----|
| 82 | Årtun J, Bergland S. Clinical trials with crystal growth conditioning as an alternative to acid-etch enamel pretreatment. <i>Am J Orthod.</i> 1984;85:333-340.                                                                                      | 738 | 1311 | 21 | 58  |
| 83 | Sjögren U, Figdor D, Persson S, Sundqvist G. Influence of infection at the time of root filling on the outcome of endodontic treatment of teeth with apical periodontitis. <i>Int Endod J.</i> 1997;30:297-306.                                     | 737 | 1613 | 32 | 35  |
| 84 | Quigley GA, Hein JW. Comparative cleansing efficiency of manual and power brushing. <i>J Am Dent Assoc.</i> 1962;65:26-29.                                                                                                                          | 737 | 1216 | 13 | 33  |
| 85 | Ferracane JL. Hygroscopic and hydrolytic effects in dental polymer networks. <i>Dent Mater.</i> 2006;22:211-222.                                                                                                                                    | 732 | 1263 | 52 | 79  |
| 86 | Torabinejad M, Chivian N. Clinical applications of mineral trioxide aggregate. <i>J Endod.</i> 1999;25:197-205.                                                                                                                                     | 731 | 1818 | 35 | 33  |
| 87 | Van Meerbeek B, Yoshihara K, Yoshida Y, Mine A, De Munck J, Van Landuyt K. State of the art of self-etch adhesives. <i>Dent Mater.</i> 2011;27:17-28.                                                                                               | 703 | 1282 | 78 | 106 |
| 88 | Albrektsson T, Wennerberg A. Oral implant surfaces: Part 1--review focusing on topographic and chemical properties of different surfaces and in vivo responses to them. <i>Int J Prosthodont.</i> 2004;17.                                          | 700 | 1156 | 44 | 44  |
| 89 | Berglundh T, Persson L, Klinge B. A systematic review of the incidence of biological and technical complications in implant dentistry reported in prospective longitudinal studies of at least 5 years. <i>J Clin Periodontol.</i> 2002;29:197-212. | 698 | 1331 | 39 | 40  |
| 90 | Zitzmann NU, Berglundh T. Definition and prevalence of peri-implant diseases. <i>J Clin Periodontol.</i> 2008;35:286-291.                                                                                                                           | 689 | 1355 | 57 | 59  |
| 91 | Peters OA. Current challenges and concepts in the preparation of root canal systems: a review. <i>J Endod.</i> 2004;30:559-567.                                                                                                                     | 683 | 1564 | 43 | 64  |
| 92 | Socransky SS. Dental biofilms: difficult therapeutic targets. <i>Periodontol 2000.</i> 2002;28:12-55.                                                                                                                                               | 682 | 1475 | 38 | 48  |
| 93 | Pashley DH, Tay F, Yiu C, Hashimoto M, Breschi L, Carvalho R, Ito S. Collagen degradation by host-derived enzymes during aging. <i>J Dent Res.</i> 2004;83:216-221.                                                                                 | 679 | 1158 | 42 | 42  |
| 94 | Quirynen M, Bollen C. The influence of surface roughness and surface-free energy on supra-and subgingival plaque formation in man: A review of the literature. <i>J Clin Periodontol.</i> 1995;22:1-14.                                             | 669 | 1206 | 27 | 60  |
| 95 | Davies JE. Understanding peri-implant endosseous healing. <i>J Dent Edu.</i> 2003;67:932-949.                                                                                                                                                       | 667 | 1209 | 39 | 43  |
| 96 | Advisory T. American Association of Oral and Maxillofacial Surgeons position paper on bisphosphonate-related osteonecrosis of the jaws. <i>J Oral Maxillofac Surg.</i> 2007;65:369-376.                                                             | 668 | 138  | 51 | 14  |
| 97 | Davidson C, De Gee A, Feilzer A. The competition between the composite-dentin bond strength and the polymerization contraction stress. <i>J Dent Res.</i> 1984;63:1396-1399.                                                                        | 660 | 1200 | 18 | 12  |
| 98 | Johnston W, Kao E. Assessment of appearance match by visual observation and clinical colorimetry. <i>J Dent Res.</i> 1989;68:819-822.                                                                                                               | 652 | 1216 | 21 | 34  |

|     |                                                                                                                                                                                                                                                                 |     |      |    |    |
|-----|-----------------------------------------------------------------------------------------------------------------------------------------------------------------------------------------------------------------------------------------------------------------|-----|------|----|----|
| 99  | Zambon JJ. Actinobacillus actinomycetemcomitans in human periodontal disease. <i>J Clin Periodontol.</i> 1985;12:1-20.                                                                                                                                          | 649 | 1030 | 19 | 10 |
| 100 | Slots J, Genco RJ. Black-pigmented Bacteroides species, Capnocytophaga species, and Actinobacillus actinomycetemcomitans in human periodontal disease: virulence factors in colonization, survival, and tissue destruction. <i>J Dent Res.</i> 1984;63:412-421. | 638 | 1010 | 18 | 4  |
